# Supplementary material for: The microbiome of dental and peri‐implant subgingival plaque during peri‐implant mucositis therapy: A randomized clinical trial
Source: PubMed Central journal article supplement — J Clin Periodontol. 2021 Nov 3;49(1):28–38. doi: 10.1111/jcpe.13566 (PMC9298297; doi:10.1111/jcpe.13566), 2021-11-03
Supplement: JCPE-49-28-s003.pdf [file JCPE-49-28-s003.pdf]

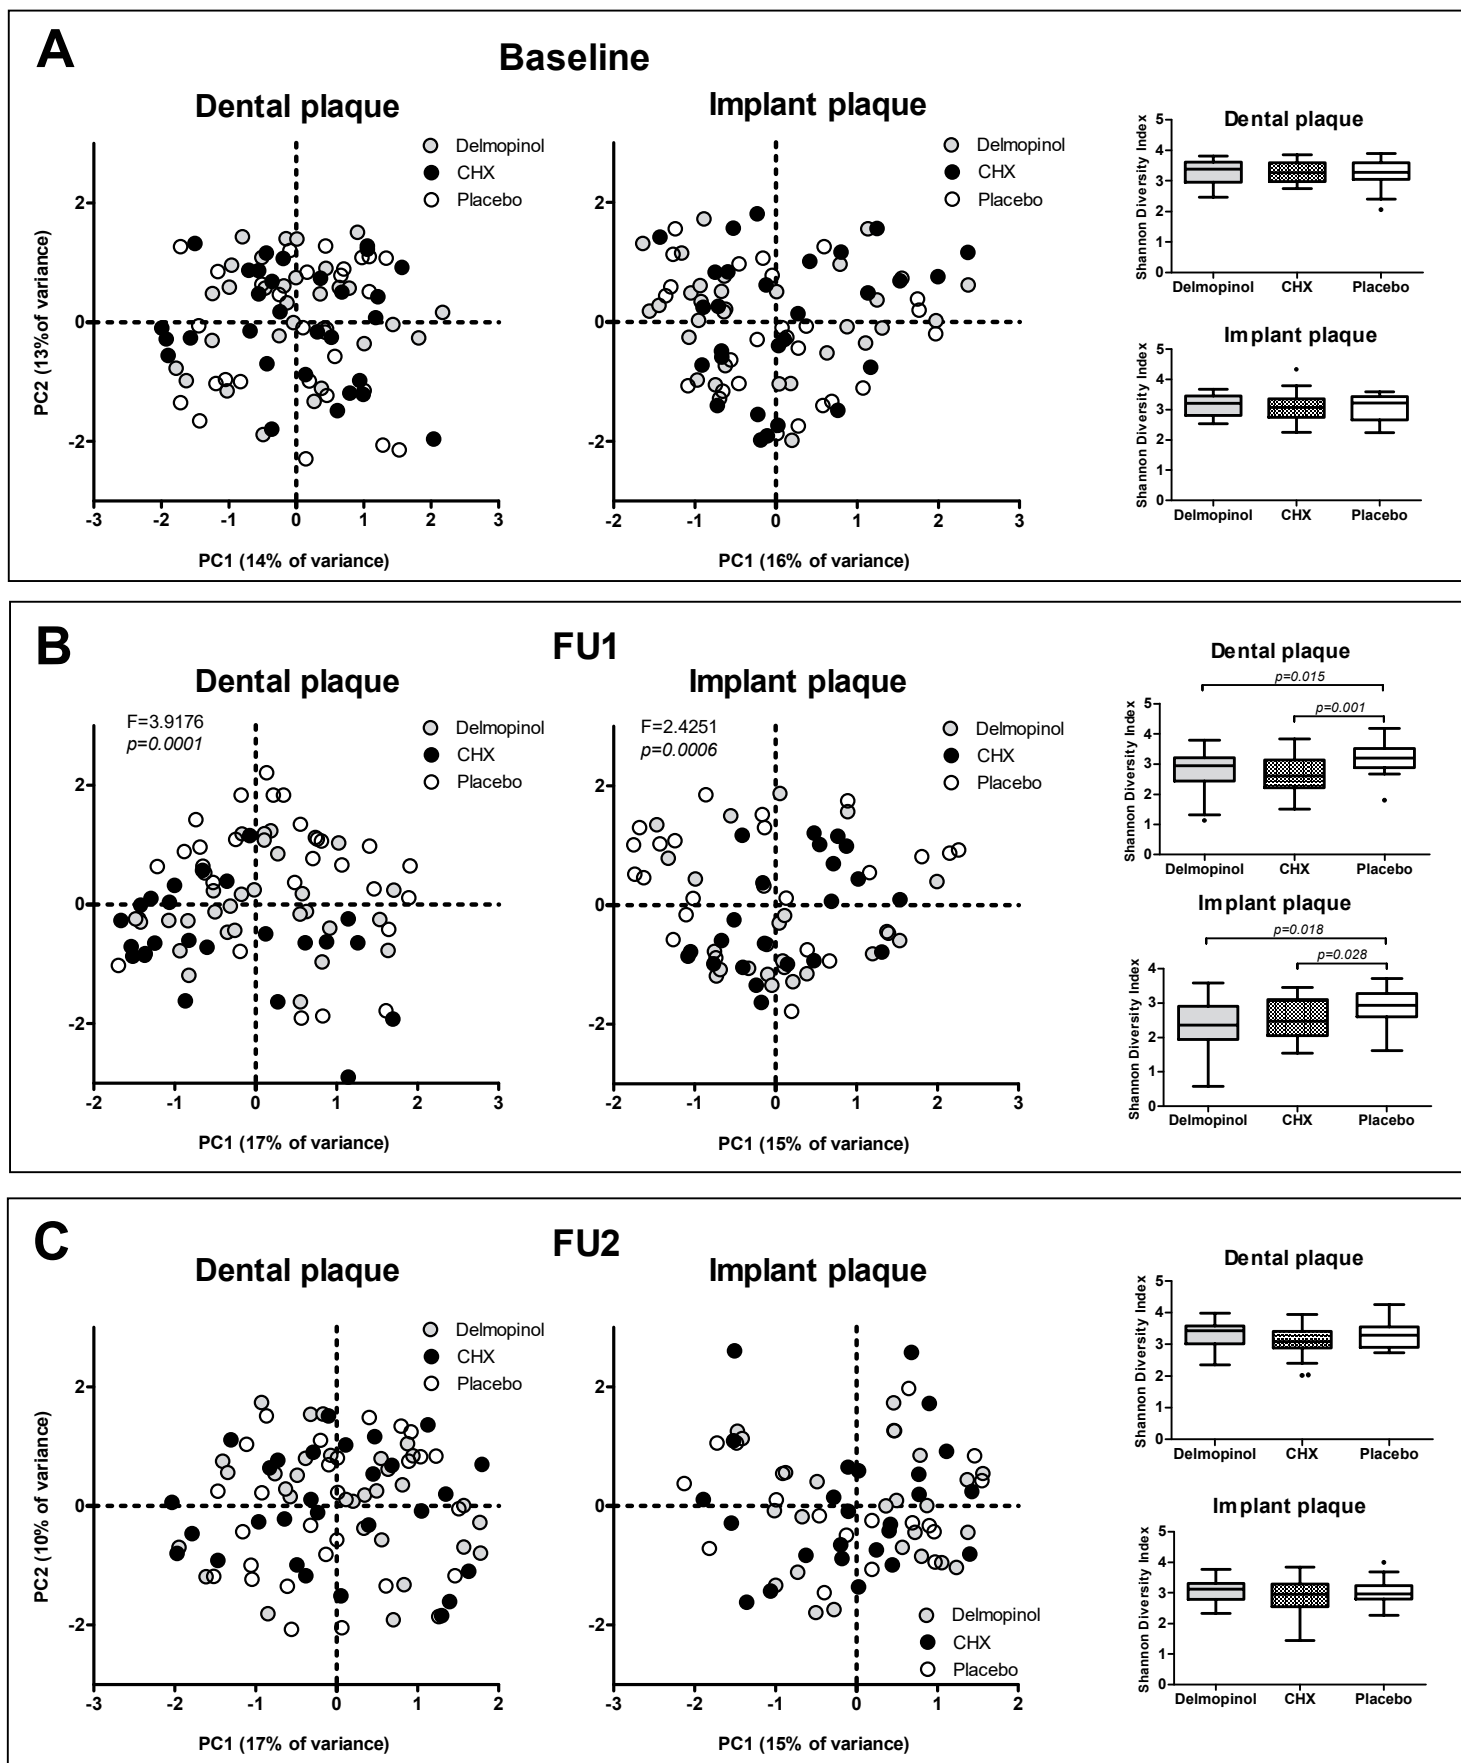

**Supplementary Figure 1.** Comparisons of the bacterial profiles (PCA, PERMANOVA) and bacterial diversity (Shannon Diversity Index) among the three groups - Delmopinol, CHX, and Placebo - per timepoint: (A) baseline visit; (B) follow-up after 1 month of mouthrinse use (FU1); (C) follow-up three months since the start of the therapy and two months after the end of the mouthrinse use (FU2).
